# Supplementary material for: Promising FDA-approved drugs with efflux pump inhibitory activities against clinical isolates of Staphylococcus aureus
Source: PLoS One. 2022 Jul 29;17(7):e0272417. doi: 10.1371/journal.pone.0272417 (PMC9337675; doi:10.1371/journal.pone.0272417)
Supplement: S16 Table — VP, verapamil; GTN, glyceryl trinitrate; D, domperidone; MF, metformin; DF, diclofenac sodium; ND, no decrease in MIC. (DOCX) [file pone.0272417.s016.docx]

**Supplementary Table 16. MICs (µg/ml) of erythromycin (EM) and clindamycin (DA) alone and in the presence of the tested compounds**

| **Isolate code** | **EM** | **EM VP** | **EM DF** | **EM GTN** | **EM D** | **EM MF** | **DA** | **DA VP** | **DA DF** | **DA GTN** | **DA D** | **DA MF** |
| --- | --- | --- | --- | --- | --- | --- | --- | --- | --- | --- | --- | --- |
| **E 189** | 2048 | 2048 (ND) | 2048 (ND) | 2048 (ND) | 2048 (ND) | 2048 (ND) | 256 | 256 (ND) | 256 (ND) | 256 (ND) | 256 (ND) | 256 (ND) |
| **B 866** | 2 | 2 (ND) | 2 (ND) | 2 (ND) | 2 (ND) | 2 (ND) | 512 | 256 (2) | 256 (2) | 256 (2) | 256 (2) | 256 (2) |
| **B 3** | 2048 | 2048 (ND) | 2048 (ND) | 2048 (ND) | 2048 (ND) | 2048 (ND) | 512 | 512 (ND) | 512 (ND) | 512 (ND) | 512 (ND) | 512 (ND) |
| **B 50** | 2048 | 2048 (ND) | 2048 (ND) | 2048 (ND) | 2048 (ND) | 2048 (ND) | 512 | 512 (ND) | 512 (ND) | 512 (ND) | 512 (ND) | 512 (ND) |
| **W 898** | 2048 | 2048 (ND) | 2048 (ND) | 2048 (ND) | 2048 (ND) | 2048 (ND) | 512 | 512 (ND) | 512 (ND) | 512 (ND) | 512 (ND) | 512 (ND) |
| **S 417** | 2 | 2 (ND) | 2 (ND) | 2 (ND) | 2 (ND) | 2 (ND) | 0.5 | 0.5 (ND) | 0.5 (ND) | 0.5 (ND) | 0.5 (ND) | 0.5 (ND) |
| **B 868** | 2048 | 2048 (ND) | 2048 (ND) | 2048 (ND) | 2048 (ND) | 2048 (ND) | 512 | 512 (ND) | 512 (ND) | 512 (ND) | 512 (ND) | 512 (ND) |
| **B 774** | 2 | 2 (ND) | 2 (ND) | 2 (ND) | 2 (ND) | 2 (ND) | 0.5 | 0.5 (ND) | 0.5 (ND) | 0.5 (ND) | 0.5 (ND) | 0.5 (ND) |
| **B 786** | 1 | 1 (ND) | 1 (ND) | 1 (ND) | 1 (ND) | 1 (ND) | 0.5 | 0.5 (ND) | 0.5 (ND) | 0.5 (ND) | 0.5 (ND) | 0.5 (ND) |
| **W 914** | 2048 | 2048 (ND) | 2048 (ND) | 2048 (ND) | 2048 (ND) | 2048 (ND) | 512 | 512 (ND) | 512 (ND) | 512 (ND) | 512 (ND) | 512 (ND) |
| **W 628** | 2048 | 2048 (ND) | 2048 (ND) | 2048 (ND) | 2048 (ND) | 2048 (ND) | 0.5 | 0.5 (ND) | 0.5 (ND) | 0.5 (ND) | 0.5 (ND) | 0.5 (ND) |
| **B 97** | 2048 | 2048 (ND) | 2048 (ND) | 2048 (ND) | 2048 (ND) | 2048 (ND) | 512 | 512 (ND) | 512 (ND) | 512 (ND) | 512 (ND) | 512 (ND) |
| **B 776** | 1024 | 32 (32) | 128 (8) | 64 (16) | 128 (8) | 128 (8) | 128 | 128 (ND) | 128 (ND) | 128 (ND) | 128 (ND) | 128 (ND) |
| **B 864** | 2048 | 512 (4) | 32 (64) | 32 (64) | 32 (64) | 256 (8) | 1024 | 1024 (ND) | 1024 (ND) | 1024 (ND) | 1024 (ND) | 1024 (ND) |
| **B 84** | 1024 | 1024 (ND) | 1024 (ND) | 1024 (ND) | 1024 (ND) | 1024 (ND) | 1 | 1 (ND) | 1 (ND) | 1 (ND) | 1 (ND) | 1 (ND) |
| **B 21** | 2048 | 2048 (ND) | 2048 (ND) | 2048 (ND) | 2048 (ND) | 2048 (ND) | 1024 | 1024 (ND) | 1024 (ND) | 1024 (ND) | 1024 (ND) | 1024 (ND) |
| **B 783** | 2048 | 2048 (ND) | 2048 (ND) | 2048 (ND) | 2048 (ND) | 2048 (ND) | 1024 | 512 (2) | 512 (2) | 512 (2) | 512 (2) | 512 (2) |
| **W 823** | 2048 | 2048 (ND) | 2048 (ND) | 2048 (ND) | 2048 (ND) | 2048 (ND) | 512 | 512 (ND) | 512 (ND) | 512 (ND) | 512 (ND) | 512 (ND) |
| **W 871** | 2048 | 2048 (ND) | 2048 (ND) | 2048 (ND) | 2048 (ND) | 2048 (ND) | 512 | 512 (ND) | 512 (ND) | 512 (ND) | 512 (ND) | 512 (ND) |
| **W 820** | 2048 | 2048 (ND) | 2048 (ND) | 2048 (ND) | 2048 (ND) | 2048 (ND) | 512 | 256 (2) | 256 (2) | 256 (2) | 256 (2) | 256 (2) |
| **B 48** | 1 | 1 (ND) | 1 (ND) | 1 (ND) | 1 (ND) | 1 (ND) | 1024 | 512 (2) | 512 (2) | 512 (2) | 512 (2) | 512 (2) |
| **W 873** | 2048 | 2048 (ND) | 2048 (ND) | 2048 (ND) | 2048 (ND) | 2048 (ND) | 1 | 1 (ND) | 1 (ND) | 1 (ND) | 1 (ND) | 1 (ND) |
| **E 444** | 0.5 | 0.5 (ND) | 0.5 (ND) | 0.5 (ND) | 0.5 (ND) | 0.5 (ND) | 0.5 | 0.5 (ND) | 0.5 (ND) | 0.5 (ND) | 0.5 (ND) | 0.5 (ND) |
| **B 31** | 1024 | 32 (32) | 16 (64) | 32 (32) | 16 (64) | 128 (8) | 1 | 1 (ND) | 1 (ND) | 1 (ND) | 1 (ND) | 1 (ND) |
| **W 446** | 2 | 2 (ND) | 1 (2) | 1 (2) | 1 (2) | 2 (ND) | 0.5 | 0.5 (ND) | 0.5 (ND) | 0.5 (ND) | 0.5 (ND) | 0.5 (ND) |
| **B 26** | 1024 | 256 (4) | 128 (8) | 128 (8) | 128 (8) | 256 (4) | 1 | 1 (ND) | 1 (ND) | 1 (ND) | 1 (ND) | 1 (ND) |

**VP, verapamil; GTN, glyceryl trinitrate; D, domperidone; MF, metformin; DF, diclofenac sodium; ND, no decrease in MIC.**
